# Supplementary material for: Cerebral venous outflow profiles are associated with the first pass effect in endovascular thrombectomy
Source: PubMed Central journal article supplement — J Neurointerv Surg. 2021 Nov 8;14(11):1056–61. doi: 10.1136/neurintsurg-2021-018078 (PMC9606492; doi:10.1136/neurintsurg-2021-018078), 2021-11-08
Supplement: neurintsurg-2021-018078supp001.pdf [file neurintsurg-2021-018078supp001.pdf]

## Supplemental Material

### Supplemental Figure 1: Flow Chart

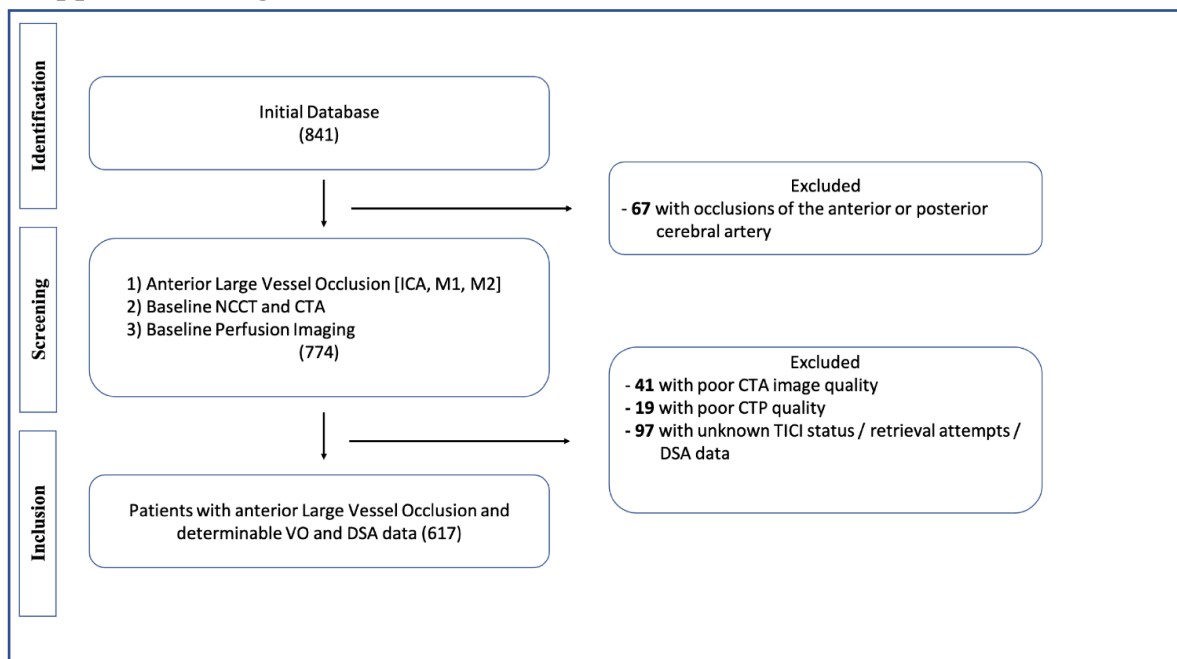

**Supplemental Table 1: First-Pass Reperusers grouped by time-periods (in years)**

| Group and timeperiod           |   | First-Pass Reperfusion | Total MT |
|--------------------------------|---|------------------------|----------|
| G1<br>(01.01.2010–31.12.2012)  | N | <b>4</b>               | 20       |
|                                | % | <b>2.00%</b>           | 3.30%    |
| G2<br>01.01.2013 – 31.12.2016) | N | <b>60</b>              | 144      |
|                                | % | <b>29.30%</b>          | 23.50%   |
| G3<br>01.01.2014 – 31.12.2020) | N | <b>141</b>             | 448      |
|                                | % | <b>68.80%</b>          | 73.20%   |
| <b>Total</b>                   | N | <b>205</b>             | 612      |
|                                | % | <b>100.00%</b>         | 100.00%  |

Legend: Subgroup analysis of all included patients undergoing endovascular thrombectomy. Certain time-periods were defined as follows: G1 (01.01.2010 – 31.12.2012), G2 (01.01.2013 – 31.12.2016) and G3 (01.01.2014 – 31.12.2020) and the number of successful first-pass reperusers are noted in the second and third column with respect to all patients who received mechanical thrombectomy treatment during the timecourse.
